# Supplementary material for: Development of Composite Sponge Scaffolds Based on Carrageenan (CRG) and Cerium Oxide Nanoparticles (CeO2 NPs) for Hemostatic Applications
Source: MDPI journal article supplement (doi:10.3390/biomimetics8050409), 2023-09-04
Supplement: s1 [file s1]

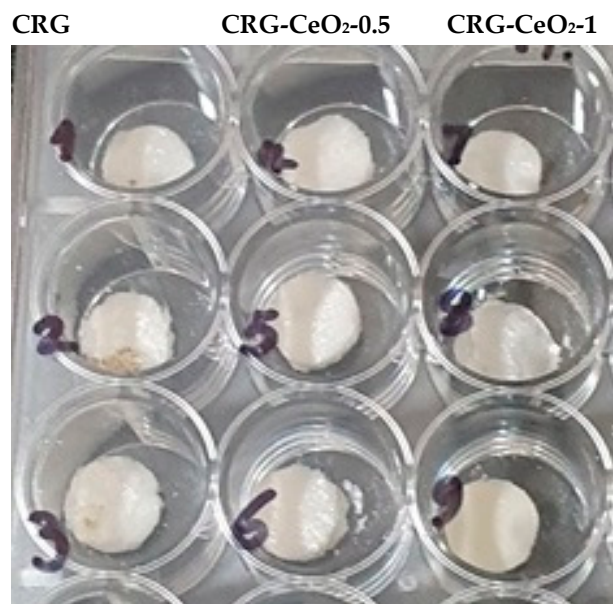

**Figure S1.** Photo of CRG, CRG-CeO<sub>2</sub>-0.5, and CRG-CeO<sub>2</sub>-1 scaffold after immersion in PBS

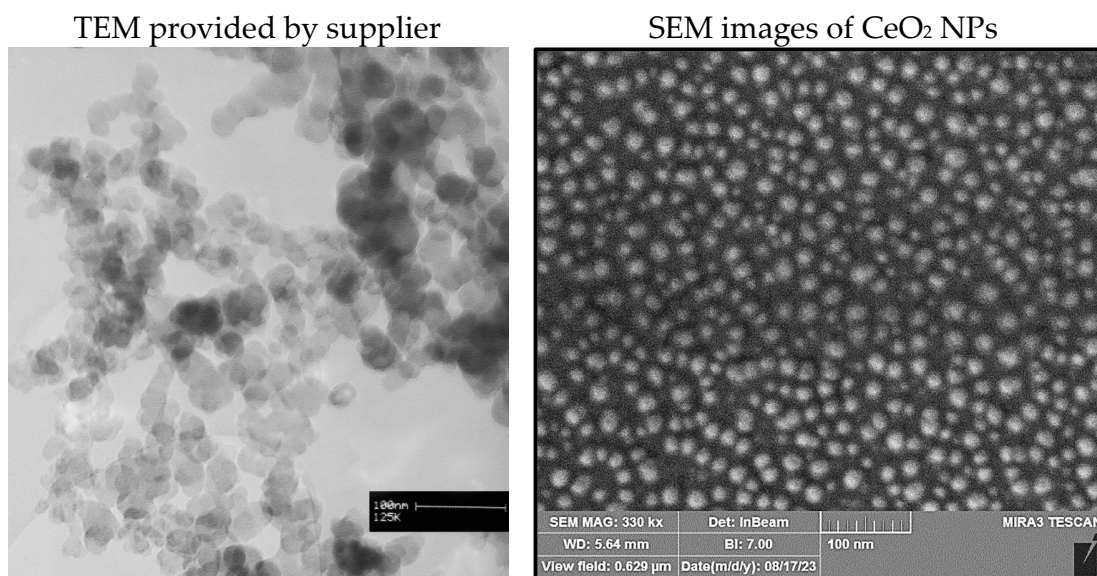

**Figure S2.** TEM and SEM Photo of CeO<sub>2</sub> NPs
